# Supplementary material
Source: publisher figshare collection journal article supplement (https://sage.figshare.com/ndownloader/files/14752370)
Supplement: Supplementary file 1 [file 14752370]

## SUPPLEMENTAL MATERIAL – Supplemental Appendix A

### *Descriptive Information and Tests of Sex Differences on Risk Factor Constructs Included in the Survey Instrument*

| <b>Risk Construct</b>                                                                                                                                      | <b># of<br/>Items</b> | <b>Cronbach<br/>alpha /<br/>Correlation</b> | <b>Overall<br/>Sample<br/>M</b> | <b>Overall<br/>Sample<br/>SD</b> | <b>F<br/>(Sex<br/>Diff)</b> | <b>p</b> | <b>Adj<br/>M (SE)<br/>Males</b> | <b>Adj<br/>M (SE)<br/>Females</b> |
|------------------------------------------------------------------------------------------------------------------------------------------------------------|-----------------------|---------------------------------------------|---------------------------------|----------------------------------|-----------------------------|----------|---------------------------------|-----------------------------------|
| <i>Individual domain</i>                                                                                                                                   |                       |                                             |                                 |                                  |                             |          |                                 |                                   |
| Attitudes favorable to antisocial behavior<br>e.g., How important is it to not lie to one's parents?                                                       | 8                     | .91                                         | 10.14                           | 3.82                             | 59.76                       | < .001   | 10.91<br>(.13)                  | 9.52<br>(.12)                     |
| Depressive affect<br>e.g., How often do you think you are no good at all?                                                                                  | 3                     | .58                                         | 7.94                            | 2.01                             | 2.11                        | .15      | 7.84<br>(.07)                   | 7.98<br>(.06)                     |
| Low perceived dangerousness of drug use<br>e.g., How dangerous is it, trying opium one or two times?                                                       | 7                     | .83                                         | 8.85                            | 2.71                             | 15.47                       | < .001   | 9.15<br>(.10)                   | 8.64<br>(.09)                     |
| <i>Family domain</i>                                                                                                                                       |                       |                                             |                                 |                                  |                             |          |                                 |                                   |
| Poor family management<br>e.g. Your parents would know if you did not go to school.                                                                        | 6                     | .73                                         | 13.05                           | 3.28                             | 62.12                       | < .001   | 13.68<br>(.11)                  | 12.48<br>(.10)                    |
| High family conflict<br>e.g., Your family members argue over and over.                                                                                     | 1                     | --                                          | 2.67                            | 0.89                             | 6.22                        | .013     | 2.61<br>(.03)                   | 2.71<br>(.03)                     |
| Parental attitudes favorable to drug use<br>e.g., How wrong do you parents think it would be for you to<br>drink alcohol?                                  | 2                     | .65                                         | 2.28                            | 0.95                             | 25.74                       | < .001   | 2.41<br>(.03)                   | 2.18<br>(.03)                     |
| Parental attitudes favorable to antisocial behavior<br>e.g., How wrong do your parents think it would be for you to<br>fight with another person your age? | 2                     | .61                                         | 2.34                            | 0.92                             | 29.30                       | < .001   | 2.47<br>(.03)                   | 2.23<br>(.03)                     |
| <i>Peer domain</i>                                                                                                                                         |                       |                                             |                                 |                                  |                             |          |                                 |                                   |
| Peer drug use<br>e.g., In the last 12 months, how many friends drank alcohol?                                                                              | 4                     | .69                                         | 6.74                            | 3.58                             | 188.13                      | <.001    | 7.96<br>(.12)                   | 5.78<br>(.11)                     |
| Peer antisocial behavior<br>e.g., In the last 12 months, how many friends were punished by<br>school officials for wrongdoing?                             | 2                     | .37                                         | 2.77                            | 1.50                             | 33.05                       | <.001    | 3.00<br>(.05)                   | 2.59<br>(.05)                     |
| <i>School domain</i>                                                                                                                                       |                       |                                             |                                 |                                  |                             |          |                                 |                                   |
| Academic failure<br>e.g., What were your school grades during the last year?                                                                               | 1                     | --                                          | 0.20                            | 0.40                             | 7.42                        | .007     | .23<br>(.01)                    | .18<br>(.01)                      |
| Low school commitment<br>e.g., How interested are you in your school courses?                                                                              | 2                     | .52                                         | 2.55                            | 1.02                             | 27.06                       | <.001    | 2.69<br>(.04)                   | 2.44<br>(.03)                     |

|                                                                                                                                            | # of<br>items | Cronbach<br>alpha /<br>Correlation | Overall<br>Sample<br><i>M</i> | Overall<br>Sample<br><i>SD</i> | <i>F</i> | <i>p</i> | Adj<br><i>M (SE)</i><br>Males | Adj<br><i>M (SE)</i><br>Females |
|--------------------------------------------------------------------------------------------------------------------------------------------|---------------|------------------------------------|-------------------------------|--------------------------------|----------|----------|-------------------------------|---------------------------------|
| <i>Community domain</i>                                                                                                                    |               |                                    |                               |                                |          |          |                               |                                 |
| Perceived availability of drugs<br>e.g., How easy would it be to get drugs in your neighborhood?                                           | 4             | .81                                | 5.74                          | 2.37                           | 10.74    | .001     | 5.52<br>(.09)                 | 5.89<br>(.08)                   |
| Transitions and mobility<br>e.g., How many times did you move homes between<br>kindergarten and 9 <sup>th</sup> or 10 <sup>th</sup> grade? | 2             | <b>.40</b>                         | 4.48                          | 2.01                           | 5.88     | .015     | 4.35<br>(.07)                 | 4.58<br>(.06)                   |

*Note.* Correlations were calculated when there were 2 items to indicate a construct and are bolded. Higher scores reflect greater risk. The F statistic refers to tests of sex differences. For tests of sex differences, means were adjusted for age, parental education, family structure, and ethnicity.

*Significant Substance Use Profile Differences on Risk Factors for Males and Females*

| Variables                                                | <i>F</i> | <i>p</i> | Low Users<br><i>M (SD)</i> | Males                            |                                  |
|----------------------------------------------------------|----------|----------|----------------------------|----------------------------------|----------------------------------|
|                                                          |          |          |                            | Normative Users<br><i>M (SD)</i> | Poly Drug Users<br><i>M (SD)</i> |
| Adolescent Attitude Favorable Toward Antisocial Behavior | 8.91     | <.001    | 10.34 (4.45) <sup>a</sup>  | 10.90 (4.19) <sup>a</sup>        | 12.29 (4.91) <sup>b</sup>        |
| Depressive Affect                                        | 24.30    | <.001    | 7.38 (2.16) <sup>a</sup>   | 7.97 (1.94) <sup>b</sup>         | 8.81 (1.67) <sup>c</sup>         |
| Low Perceived Dangerousness of Drug Use                  | 8.83     | <.001    | 8.83 (3.31) <sup>a</sup>   | 9.04 (2.81) <sup>a</sup>         | 10.17 (3.31) <sup>b</sup>        |
| Poor Family Management                                   | 19.45    | <.001    | 12.92 (3.29) <sup>a</sup>  | 14.04 (3.10) <sup>b</sup>        | 14.75 (2.60) <sup>c</sup>        |
| High Family Conflict                                     | 3.89     | .02      | 2.51 (1.00) <sup>a</sup>   | 2.66 (.88) <sup>b</sup>          | 2.75 (.80) <sup>b</sup>          |
| Parental Attitudes Favorable to Drug Use                 | 11.26    | <.001    | 2.29 (1.03) <sup>a</sup>   | 2.36 (1.02) <sup>a</sup>         | 2.86 (1.78) <sup>b</sup>         |
| Parental Attitudes Favorable to Antisocial Behavior      | 4.72     | .009     | 2.42 (1.07) <sup>a</sup>   | 2.44 (1.04) <sup>a</sup>         | 2.76 (1.37) <sup>b</sup>         |
| Peer Drug Use                                            | 42.09    | <.001    | 6.76 (3.52) <sup>a</sup>   | 8.32 (3.56) <sup>b</sup>         | 10.23 (4.58) <sup>c</sup>        |
| Peer Antisocial Behavior                                 | 16.12    | <.001    | 2.77 (1.45) <sup>a</sup>   | 2.93 (1.57) <sup>a</sup>         | 3.75 (2.35) <sup>b</sup>         |
| Poor School Achievement                                  | 3.97     | .02      | .18 (.38) <sup>a</sup>     | .27 (.44) <sup>b</sup>           | .24 (.43)                        |
| Low School Commitment                                    | 5.46     | .004     | 2.56 (1.11) <sup>a</sup>   | 2.71 (1.16) <sup>a</sup>         | 2.96 (1.25) <sup>b</sup>         |
| Perceived Availability of Drugs in Community             | 9.88     | <.001    | 5.16 (2.19) <sup>a</sup>   | 5.62 (2.25) <sup>b</sup>         | 6.20 (2.59) <sup>c</sup>         |
| Transitions and Mobility                                 | 4.70     | .009     | 4.15 (1.92) <sup>a</sup>   | 4.48 (1.99) <sup>a</sup>         | 4.73 (2.03) <sup>b</sup>         |

|                                                             | <i>F</i> | <i>p</i> | Low Users<br><i>M (SD)</i> | Females<br>Glue - OTC<br>Users<br><i>M (SD)</i> | High Drug<br>Users<br><i>M (SD)</i> |
|-------------------------------------------------------------|----------|----------|----------------------------|-------------------------------------------------|-------------------------------------|
| Adolescent Attitude Favorable<br>Toward Antisocial Behavior | 12.00    | <.001    | 9.39 (2.81) <sup>a</sup>   | 9.61 (3.52) <sup>a</sup>                        | 11.31 (4.11) <sup>b</sup>           |
| Depressive Affect                                           | 12.28    | <.001    | 7.84 (1.98) <sup>a</sup>   | 8.34 (1.95) <sup>b</sup>                        | 8.93 (1.90) <sup>c</sup>            |
| Low Perceived Dangerousness<br>of Drug Use                  | 9.90     | <.001    | 8.49 (2.19) <sup>a</sup>   | 9.05 (2.43) <sup>b</sup>                        | 9.61 (3.43) <sup>b</sup>            |
| Poor Family Management                                      | 15.17    | <.001    | 12.37 (3.21) <sup>a</sup>  | 12.33 (3.26) <sup>a</sup>                       | 14.58 (3.03) <sup>b</sup>           |
| High Family Conflict                                        | 5.01     | .007     | 2.70 (0.85) <sup>a</sup>   | 2.66 (0.92) <sup>a</sup>                        | 3.03 (0.73) <sup>b</sup>            |
| Peer Drug Use                                               | 41.31    | <.001    | 5.49 (2.76) <sup>a</sup>   | 5.71 (2.58) <sup>a</sup>                        | 8.76 (4.06) <sup>b</sup>            |
| Peer Antisocial Behavior                                    | 11.90    | <.001    | 2.52 (1.20) <sup>a</sup>   | 2.71 (1.30) <sup>a</sup>                        | 3.26 (1.72) <sup>b</sup>            |
| Low School Commitment                                       | 5.96     | .013     | 2.43 (0.86) <sup>a</sup>   | 2.30 (0.79) <sup>a</sup>                        | 2.74 (1.21) <sup>b</sup>            |
| Transitions and Mobility                                    | 4.06     | .02      | 4.52 (2.06) <sup>a</sup>   | 4.50 (1.78) <sup>a</sup>                        | 5.23 (2.14) <sup>b</sup>            |

*Note.* Groups with different superscripts are significantly different.
